# Supplementary material for: Full spectrum flow cytometry reveals mesenchymal heterogeneity in first trimester placentae and phenotypic convergence in culture, providing insight into the origins of placental mesenchymal stromal cells
Source: eLife journal article supplement (doi:10.7554/elife.76622), 2022-08-03

Table 3- source data 3

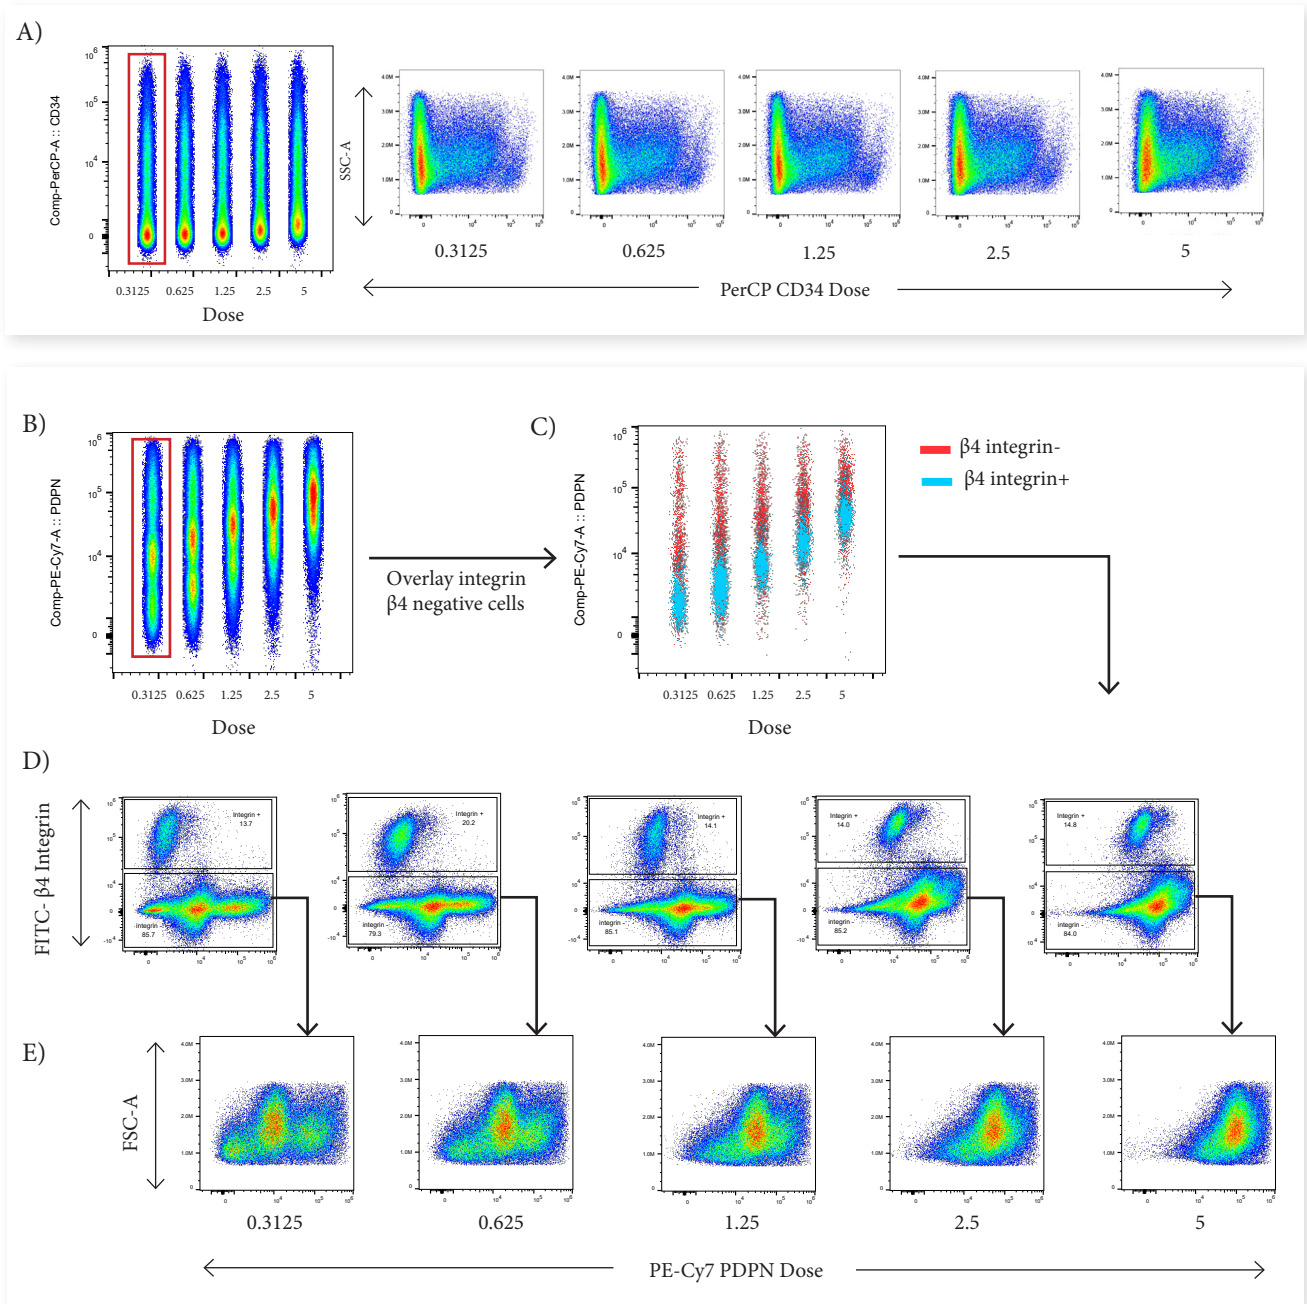

Supplement: supp [file elife-76622-supp-v1.zip]
